# Supplementary material
Source: PubMed Central journal article supplement (PMC6402979)

Supplemental Figure 1

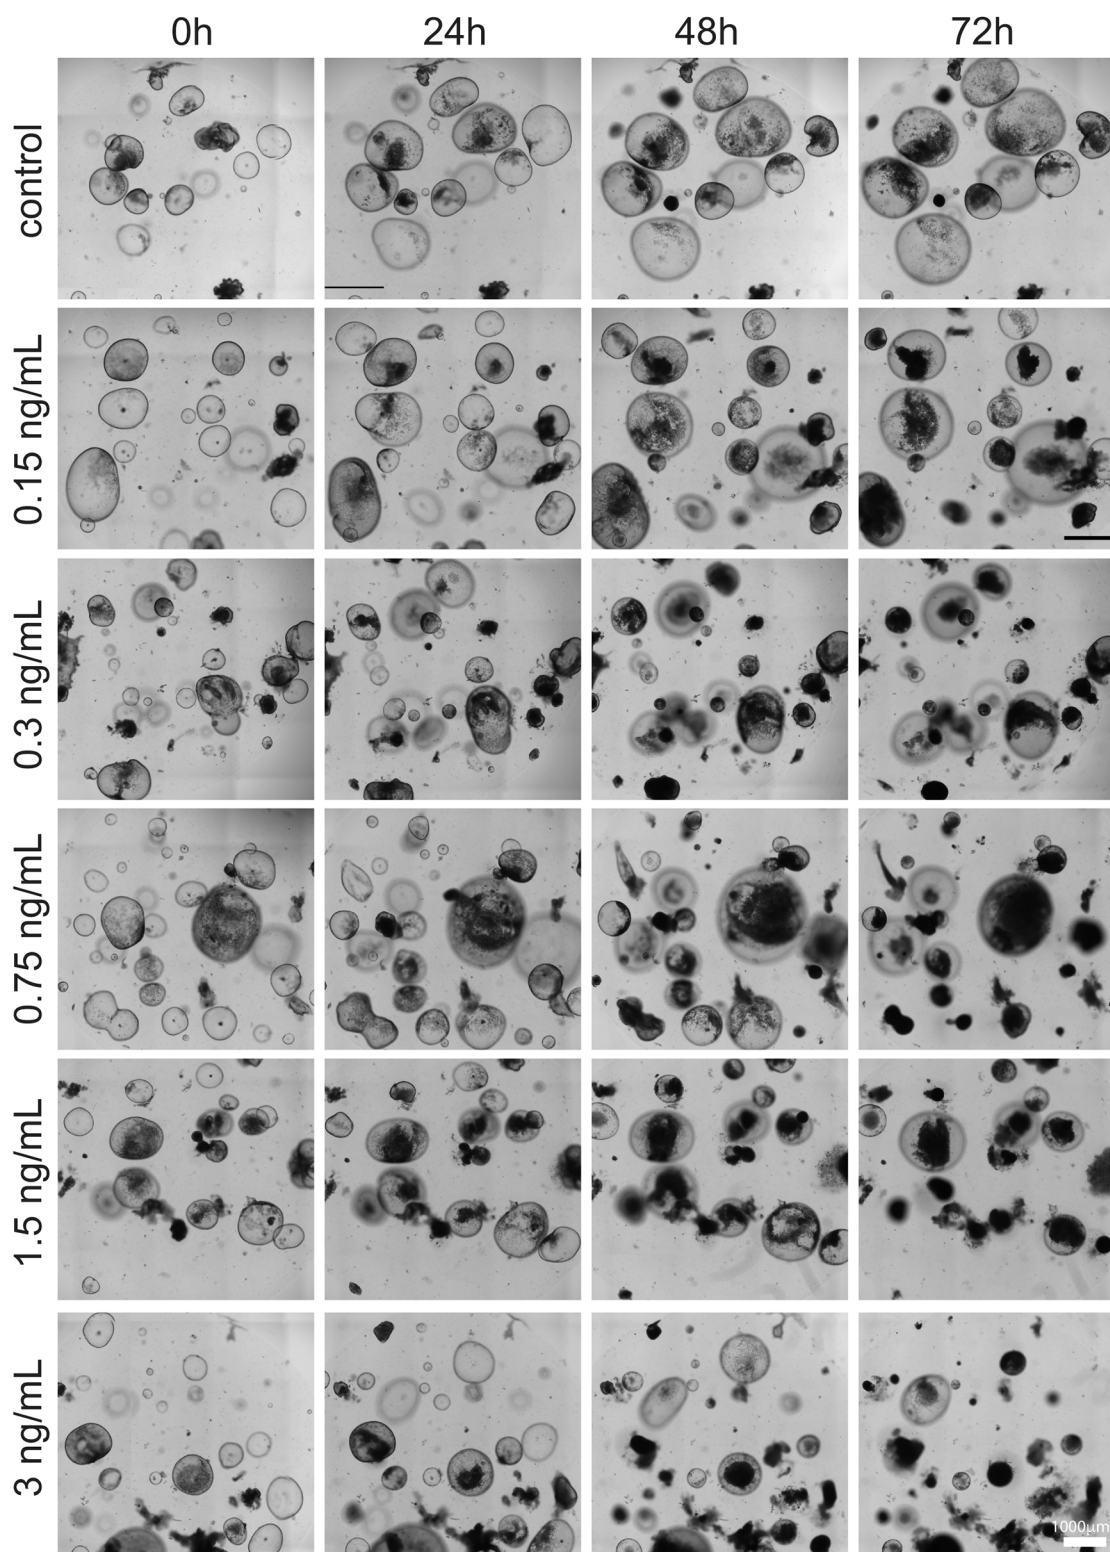

Supplemental figure 2

Propidium iodide (RFP)

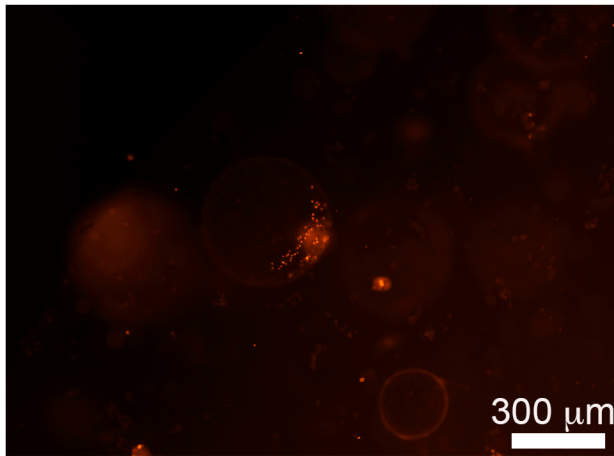

bright field + RFP

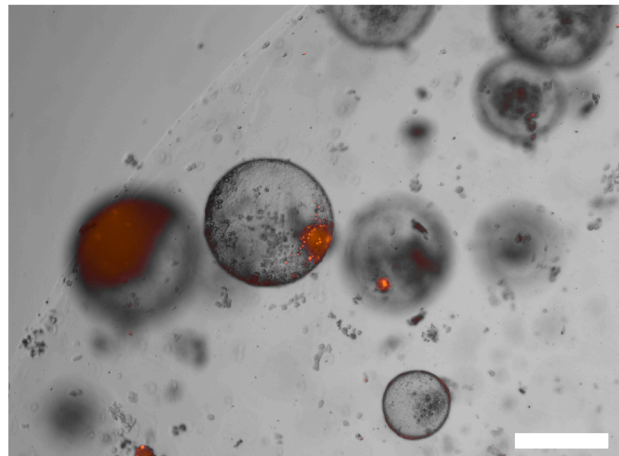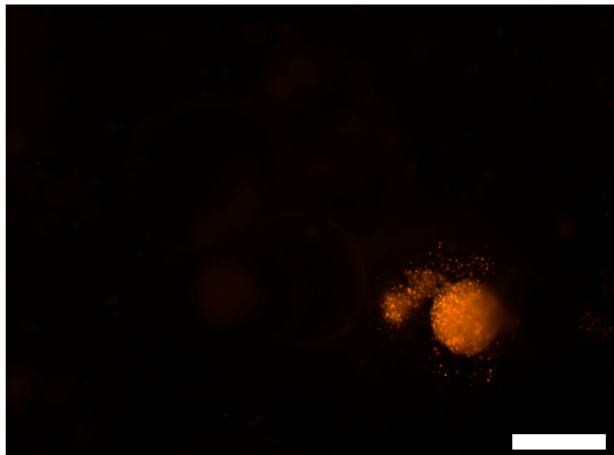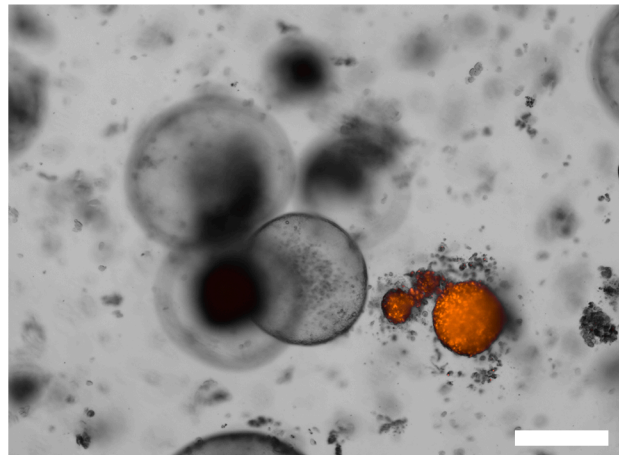

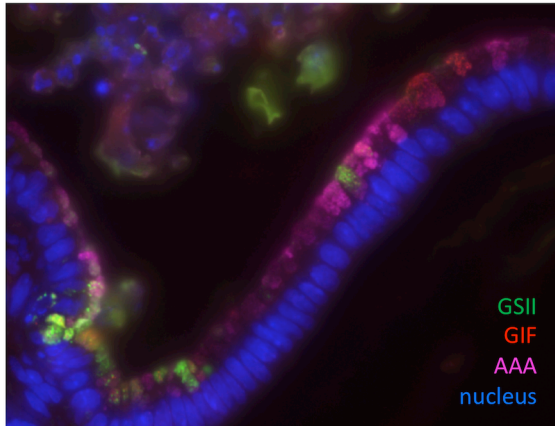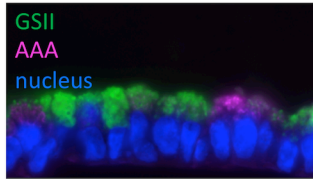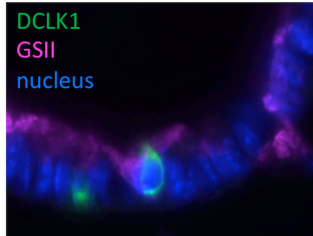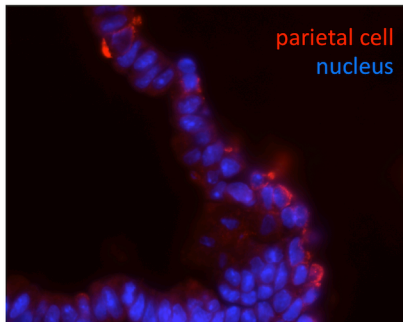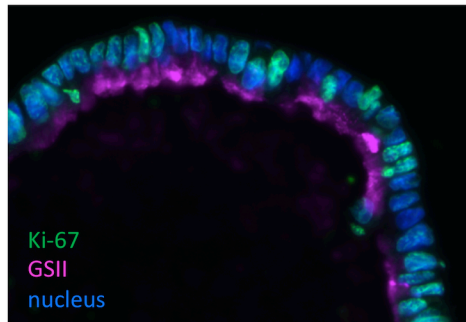

Supplement: NIHMS1000826-supplement-1.pdf [file NIHMS1000826-supplement-1.pdf]
